# Supplementary material
Source: Springer Nature journal article supplement (https://www.springermedizin.de/resource/supplementary/12958_2009_636_MOESM3_ESM.pdf/9568358)

**AMH**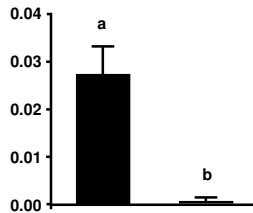**CYP19**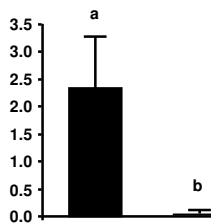**FSHR**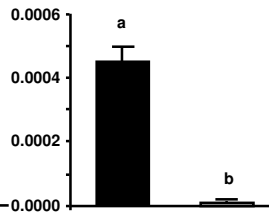**GPX3**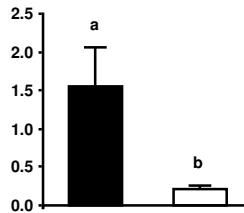**PIGF**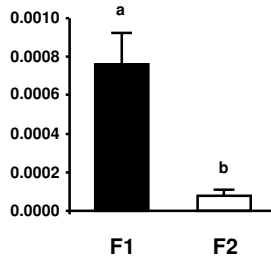**PLA2G1B**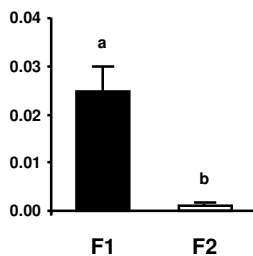**SCD**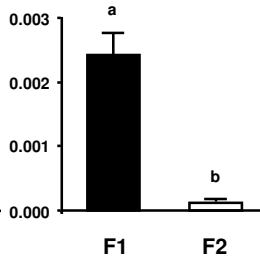**TRB2**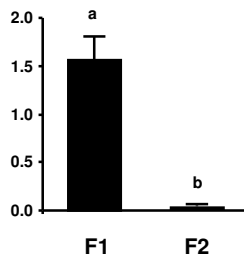

Supplement: MOESM3 [file 9568358]
